# Supplementary material for: RAFT-mediated Pickering emulsion polymerization with cellulose nanocrystals grafted with random copolymer as stabilizer
Source: RSC Adv. 2018 Aug 13;8(50):28660–7. doi: 10.1039/c8ra03816c (PMC9084400; doi:10.1039/c8ra03816c)
Supplement: RA-008-C8RA03816C-s001 [file RA-008-C8RA03816C-s001.pdf]

## Supporting Information

### **RAFT-mediated Pickering Emulsion Polymerization with Cellulose Nanocrystals Graft Random Copolymer as Stabilizer**

**Liangjiu Bai<sup>1,2</sup>, Xinyan Jiang<sup>1,2</sup>, Beifang Liu<sup>1,2</sup>, Wenxiang Wang<sup>1,2\*</sup>, Hou Chen<sup>1,2\*</sup>, Zhongxin Xue<sup>1,2</sup>,  
10 Yuzhong Niu<sup>1,2</sup>, Huawei Yang<sup>1,2</sup>, Donglei Wei<sup>1,2</sup>**

*1. School of Chemistry and Materials Science, Key Laboratory of High Performance and Functional Polymer in the Universities of Shandong Province, Ludong University, Yantai 264025, China.*

*2. Collaborative Innovation Center of Shandong Province for High Performance Fibers and Their  
15 Composites, Ludong University, Yantai 264025, China.*

*E-mail: wenxiang-tianshi@163.com (W. X. Wang), +Fax: 86-535-6669070; ldupolymchen@163.com (H. Chen), Fax: +86-535-6697933.*

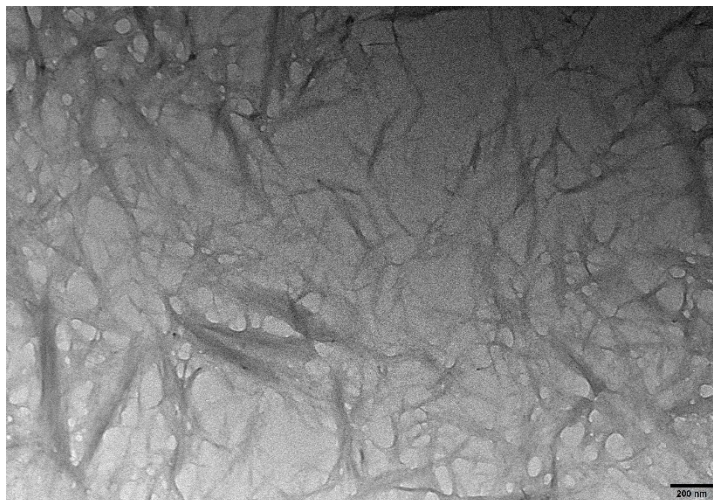

**Figure S1.** TEM image of CNCs.

**Table S1.** EDS data of CNCs, Poly(AN-*r*-BA), Poly(VT-*r*-BA) and Poly(VT-*r*-BA)-*g*-CNCs.

| Sample                                 | Composition (wt%) |       |       | [N]/[O] | [C]/[O] |
|----------------------------------------|-------------------|-------|-------|---------|---------|
|                                        | C                 | O     | N     |         |         |
| CNCs                                   | 50.69             | 40.31 | --    | --      | 1.68    |
| Poly(AN- <i>r</i> -BA)                 | 69.70             | 19.10 | 11.20 | 0.67    | 4.88    |
| Poly(VT- <i>r</i> -BA)                 | 62.44             | 11.30 | 26.06 | 2.63    | 7.37    |
| Poly(VT- <i>r</i> -BA)- <i>g</i> -CNCs | 56.95             | 20.15 | 22.90 | 1.30    | 3.76    |

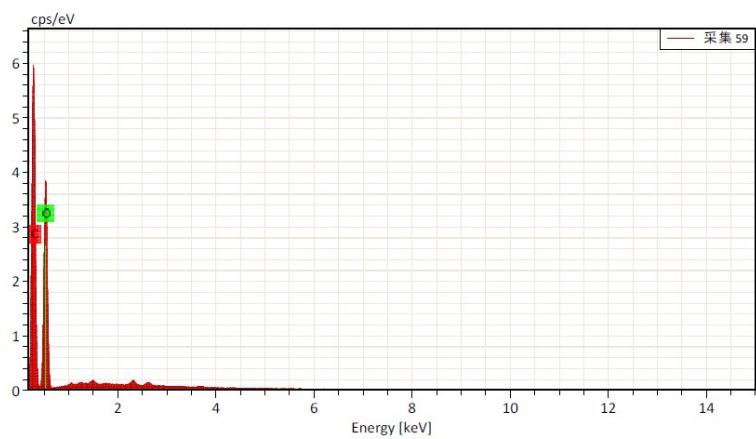

(a)

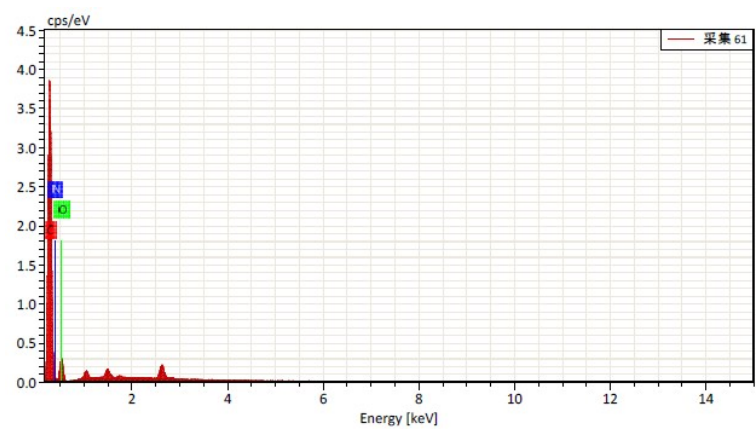

(b)

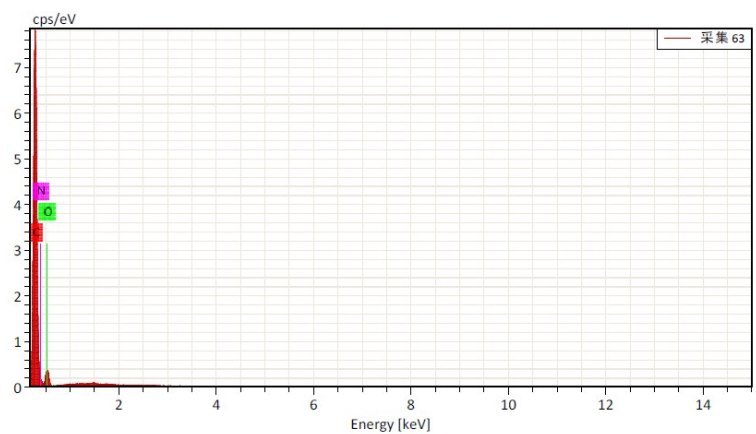

(c)

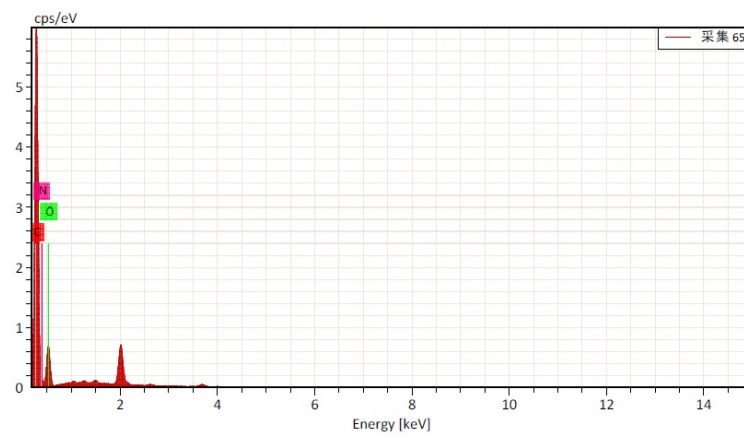

(d)

**Figure S2.** EDS picture of CNCs (a), Poly(AN-*r*-BA) (b), Poly(VT-*r*-BA) (c) and Poly(VT-*r*-BA)-*g*-CNCs (d).

**FT-IR spectra of poly(AN-*r*-BA), poly(VT-*r*-BA), CNCs and poly(VT-*r*-BA)-*g*-CNCs.** Poly(AN-*r*-BA), poly(VT-*r*-BA), CNCs and poly(VT-*r*-nBA)-*g*-CNCs was further characterized by IR measurement. The click chemistry of poly(AN-*r*-BA) with sodium azide lead to poly(VT-*co*-BA) containing tetrazolium group. As shown in figure 5, the FTIR spectrums of poly(AN-*r*-BA) and 5 poly(VT-*r*-BA) had their obvious IR characters. In spectrogram line of poly(AN-*r*-BA), the peak absorption at  $2240\text{ cm}^{-1}$  was in accordance with  $\text{C}\equiv\text{N}$  stretching vibration, absent in the IR spectrum of poly(VT-*r*-BA) due to  $\text{C}\equiv\text{N}$  groups converted into tetrazolium group. Moreover, there was additional peak at  $1545\text{ cm}^{-1}$  and  $1610\text{ cm}^{-1}$  associated with tetrazolium group, appears with the IR spectrum of poly(VT-*r*-BA). Therefore, these phenomenon manifest successfully preparation of poly(VT-*r*-BA) 10 from poly(AN-*r*-BA). poly(VT-*r*-BA)-CNCs was obtained by Mitsunobu reaction between poly(VT-*r*-BA) and CNCs. In IR spectra of CNCs, all characteristic was found. Meanwhile, the peak at  $1723\text{ cm}^{-1}$  attributed to  $\text{C}=\text{O}$  stretching vibration derived from poly(VT-*r*-BA) and  $1059\text{ cm}^{-1}$  from CNCs were observed in IR spectrum line poly(VT-*r*-BA)-CNCs at the same time. On the basis of analyzing these character, it clearly demonstrated that the successful synthesis of poly(VT-*r*-nBA)-*g*-CNCs.

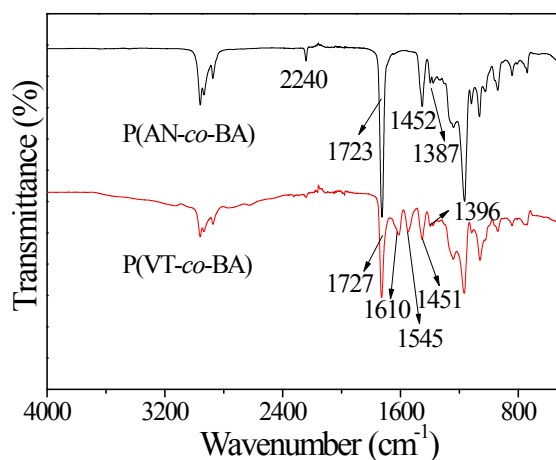

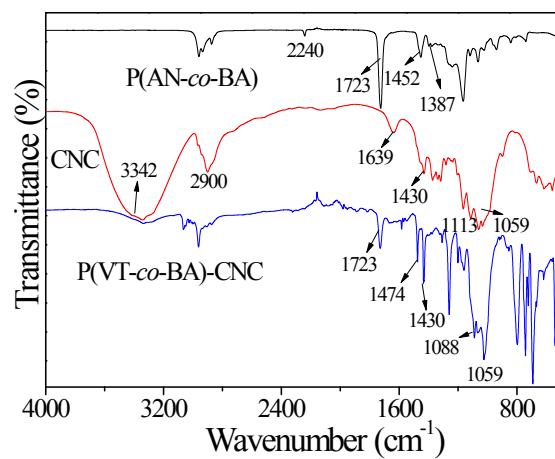

**Figure S3.** The FT-IR spectrogram of poly(AN-*r*-BA), poly(VT-*r*-BA), CNCs and poly(VT-*r*-BA)-*g*-CNCs.
